# Supplementary material
Source: PubMed Central journal article supplement (PMC1959481)

### **Supplemental figure 1**

Heart sections were obtained from the vehicle- and M-CSF-treated mice at 3 and 7 days after MI, and these were stained with HE. Bar graphs indicate the MI area. Results are expressed as mean  $\pm$  SEM (each n=3).

### **Supplemental figure 2**

(A) Heart sections were obtained from the vehicle- and M-CSF-treated mice at 3 days after MI, and these were analyzed by TUNEL staining. (B) Cardiomyocytes were stimulated with hypoxia/reoxygenation (HR) in the absence or presence of M-CSF (10 ng/mL). Nucleic acid was stained with DAPI (red: TUNEL-positive cells, blue: DAPI).

Supplemental Figure 1

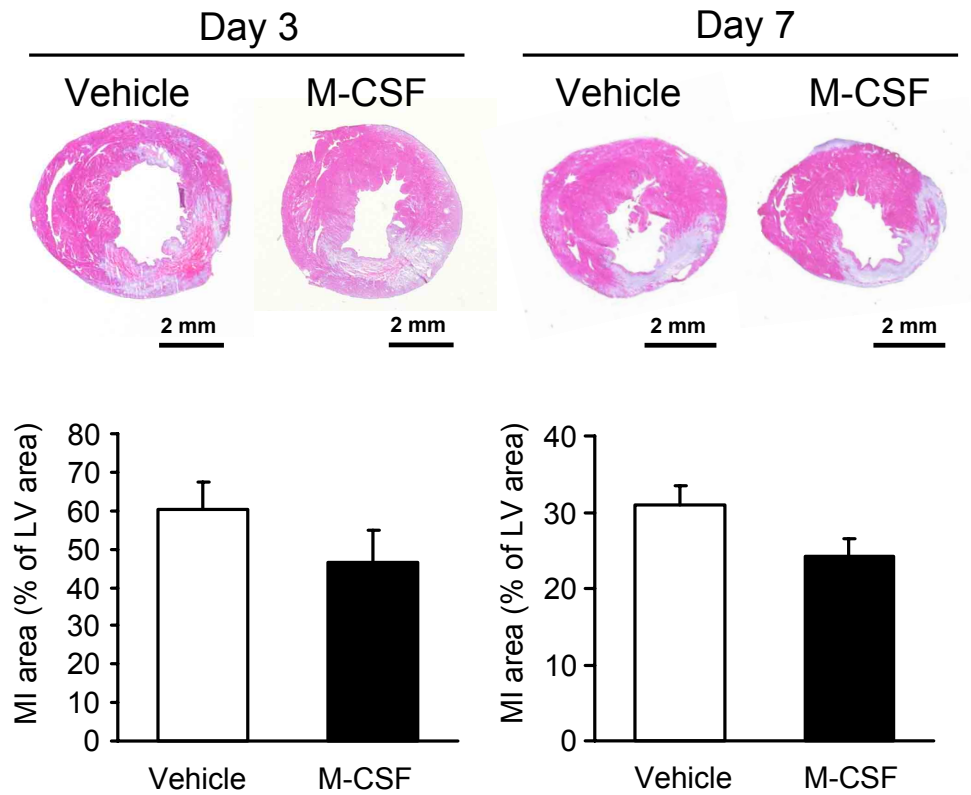

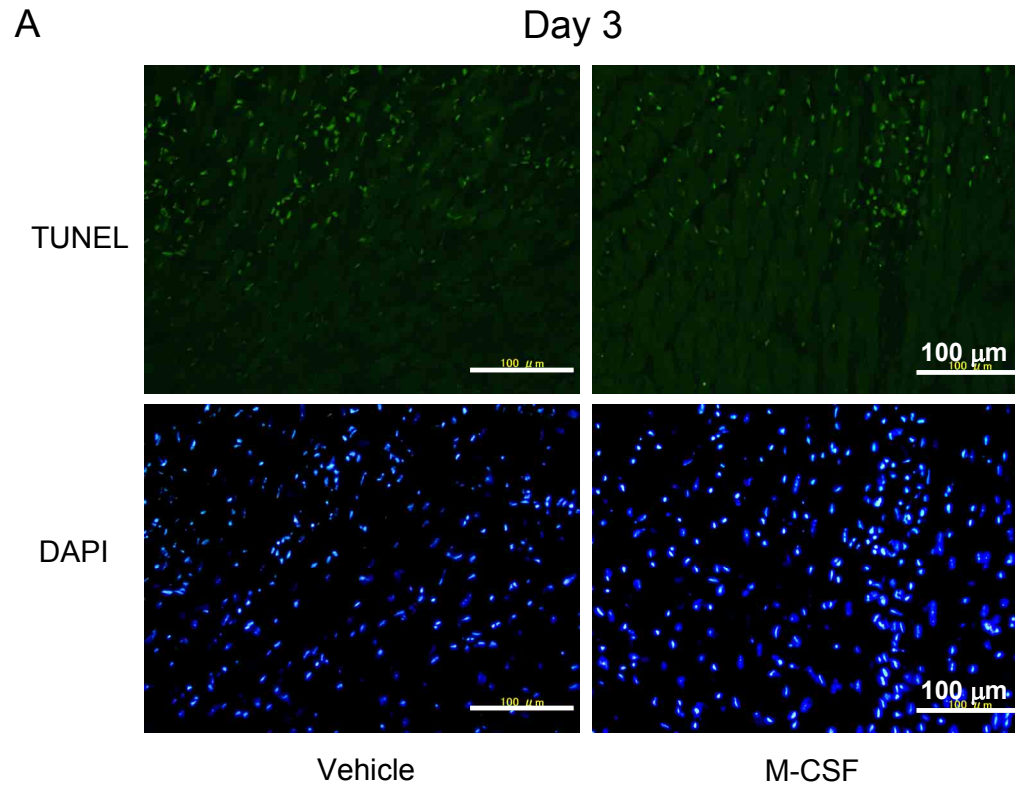

Supplemental Figure 2

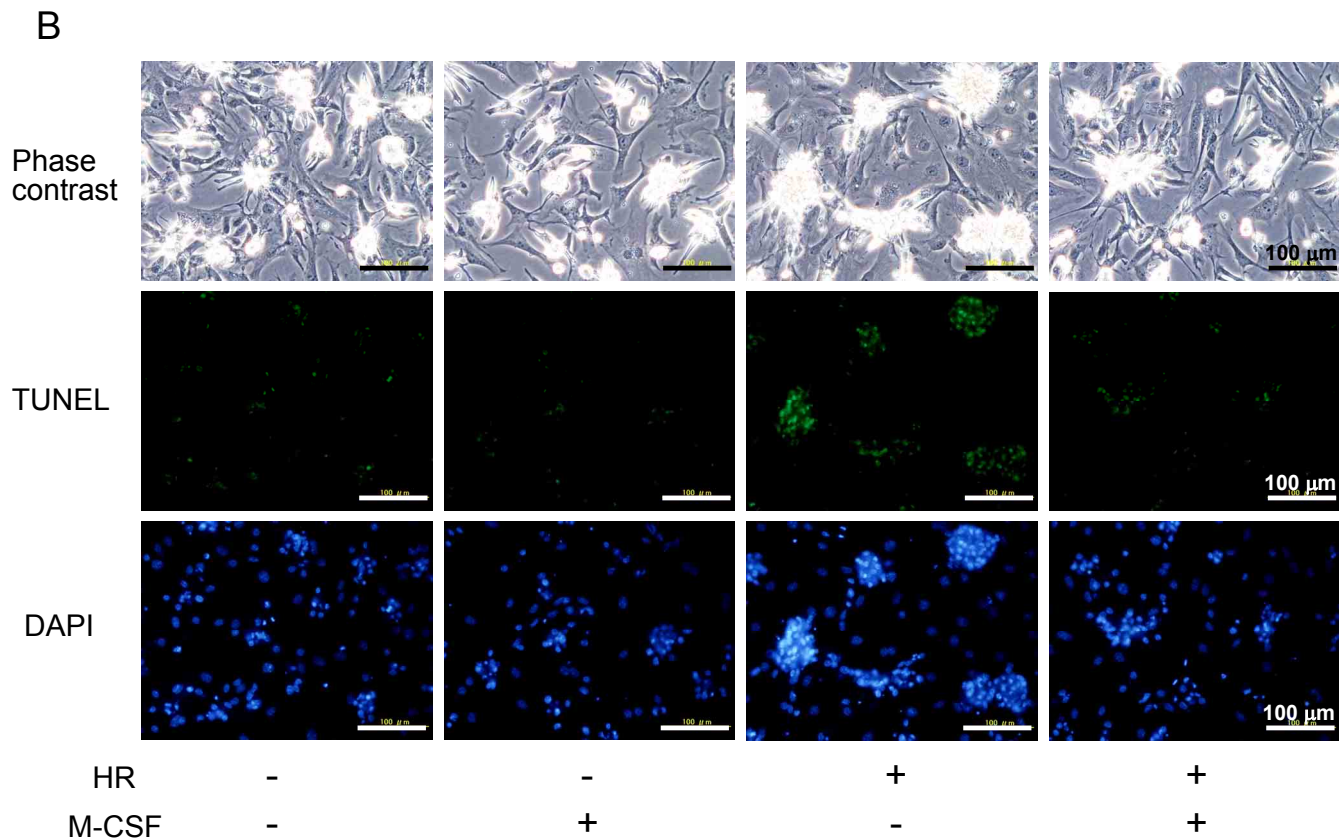

Supplement: amjpathol_ajpath.2007.061276_1.pdf [file amjpathol_ajpath.2007.061276_1.pdf]
